# Supplementary material for: Public Health and Economic Impact of transitioning to a 20-valent pneumococcal vaccine in Kazakhstan’s Pediatric National Immunization Program
Source: Research Square preprint supplement (doi:10.21203/rs.3.rs-8630544/v1), 2026-02-04
Supplement: Supplementary file 1 [file 037d51c2f9ab2015ee8727d7.docx]

Supplementary Materials

| **Table S1.** General population data1 | |
| --- | --- |
| **Age groups** | **Population size** |
| **<12 months** | 362,358 |
| **12–23 months** | 384,107 |
| **24–35 months** | 402,455 |
| **36–47 months** | 441,107 |
| **48–59 months** | 422,889 |
| **5–17 years** | 4,889,576 |
| **18–34 years** | 4,412,336 |
| **35–49 years** | 4,084,912 |
| **50–64 years** | 3,013,783 |
| **≥65 years** | 1,869,876 |
| **Total** | 20,283,399 |

| **Table S2.** Incoming birth cohort data2 | |
| --- | --- |
| **Year in model** | **Number of <12-month-olds in incoming birth cohort** |
| **Year 2** | 362,358 |
| **Year 3** | 357,968 |
| **Year 4** | 355,522 |
| **Year 5** | 353,442 |
| **Year 6** | 353,472 |
| **Year 7** | 355,236 |
| **Year 8** | 357,368 |
| **Year 9** | 360,695 |
| **Year 10** | 364,726 |

| **Table S3.** IPD serotype distribution3 | | | | |
| --- | --- | --- | --- | --- |
|  | PCV10 | PCV13 | PCV15 | PCV20 | |
| 2-17 years | 20% | 60% | 70% | 80% | |
| 18-57 years | 16% | 52% | 52% | 66% | |
| 58+ years | 13% | 62% | 69% | 87% | |
| Abbreviation: PCV, pneumococcal conjugate vaccine  Note: the serotype distribution children of <2years of age used in the model was assumed to be the same as 2-17 years | | | | |

| **Table S4.** Utility parameters | | | | | |
| --- | --- | --- | --- | --- | --- |
| **QALY decrements** | | | | | |
| 0–17 years4-6 | 0.023 | 0.008 | 0.006 | 0.004 | 0.005 |
| ≥18 years7,8 | 0.130 | 0.130 | 0.130 | 0.045 | **-** |
| **Baseline utilities9** | **<18 years** | **18–34 years** | **35–49 years** | **50–64 years** | **65+ years** |
| Female | 0.91 | 0.90 | 0.84 | 0.76 | 0.61 |
| Male | 0.91 | 0.91 | 0.85 | 0.78 | 0.67 |
| Abbreviations: QALY, quality-adjusted life years | | | | | |

| **Table S5.** Alternative input parameters for hospitalized and non-hospitalized pneumonia incidence (2022). | | | | |
| --- | --- | --- | --- | --- |
| **Age** | **IPD incidence 10** | | **Proportion of meningitis10** | |
| **Base case** | **Scenario*** | **Base case** | **Scenario*** |
| <12 months | 18.3 | 10.9 | 2.60% | 4.20% |
| 12-23 months | 11.9 | 7.4 | 3.10% | 5.10% |
| 24-35 months | 12.3 | 7.8 | 4.10% | 6.60% |
| 36-47 months | 12.9 | 8.4 | 4.90% | 8.00% |
| 48-59 months | 13.4 | 8.9 | 5.70% | 9.30% |
| 5 - 17 years | 8.4 | 5.1 | 2.60% | 4.50% |
| 18 - 34 years | 12.5 | 9.1 | 9.80% | 15.30% |
| 35 - 49 years | 21.1 | 12.5 | 1.80% | 3.00% |
| 50 - 64 years | 29.6 | 17.4 | 1.60% | 2.70% |
| 65+ years | 36.5 | 20.2 | 2.60% | 2.70% |
| The proportion of bacteremic pneumonia (not caused by S.pne) was 20% in KZH adults and this was assumed across all ages. This assumption was used to extract the number of bacteremic pneumonia caused by S.pne in Kazakhstan to obtain representative incidences for bacteremia | | | | |

| **Table S6.** Alternative discount rate estimates. | | |
| --- | --- | --- |
| **Parameter** | **Base case** | **Scenario** |
| Cost discount rate | 5% | 1%-10% |
| Health discount rate | 5% | 1%-10% |

| **Table S7.** Alternative direct effects for PCV10-SII. | | | | |
| --- | --- | --- | --- | --- |
|  | **Base Case** | | **Scenario¶** | |
| *Post-primary dose VE (<12 months)* | *Post-booster dose VE (<2 years)* | *Post-primary dose VE (<12 months)* | *Post-booster dose VE (<2 years)* |
| **IPD11** | 37.3% | 49.3% | 47.6% | 62.9% |
| **All-cause inpatient pneumonia12** | 10.7% | 14.2% | 13.7% | 18.1% |
| **All-cause outpatient pneumonia13** | 2.5% | 3.3% | 3.2% | 4.3% |
| **All-cause AOM14** | 5.9% | 4.3% | 4.2% | 5.5% |

| **Table S8.** Alternative indirect effects for PCV10-SII. | | | | | |
| --- | --- | --- | --- | --- | --- |
|  | | **<18 years** | **18-34 years** | **35-64 years** | **≥65 years** |
| **IPD 15** | *Base case* | 46.1% | 48.9% | 42.8% | 40.6% |
| *Scenario* | 58.9% | 62.4% | 54.6% | 51.8% |
| **All-cause inpatient pneumonia16,17** | *Base case* | 16.4% | 8.3% | | |
| *Scenario* | 21.6% | 10.6% | | |
| **All-cause outpatient pneumonia16,17** | *Base case* | 12.5% | 0.0% | | |
| *Scenario* | 15.9% |
| **All-cause AOM18** | *Base case* | 11.1% | 0.0% | | |
| *Scenario* | 14.2% |

| **Figure S1.** Deterministic sensitivity analysis results for PCV20-PFE 2+1 vs PCV10-SII 3+0 |
| --- |
| 1. **DSA cost results**   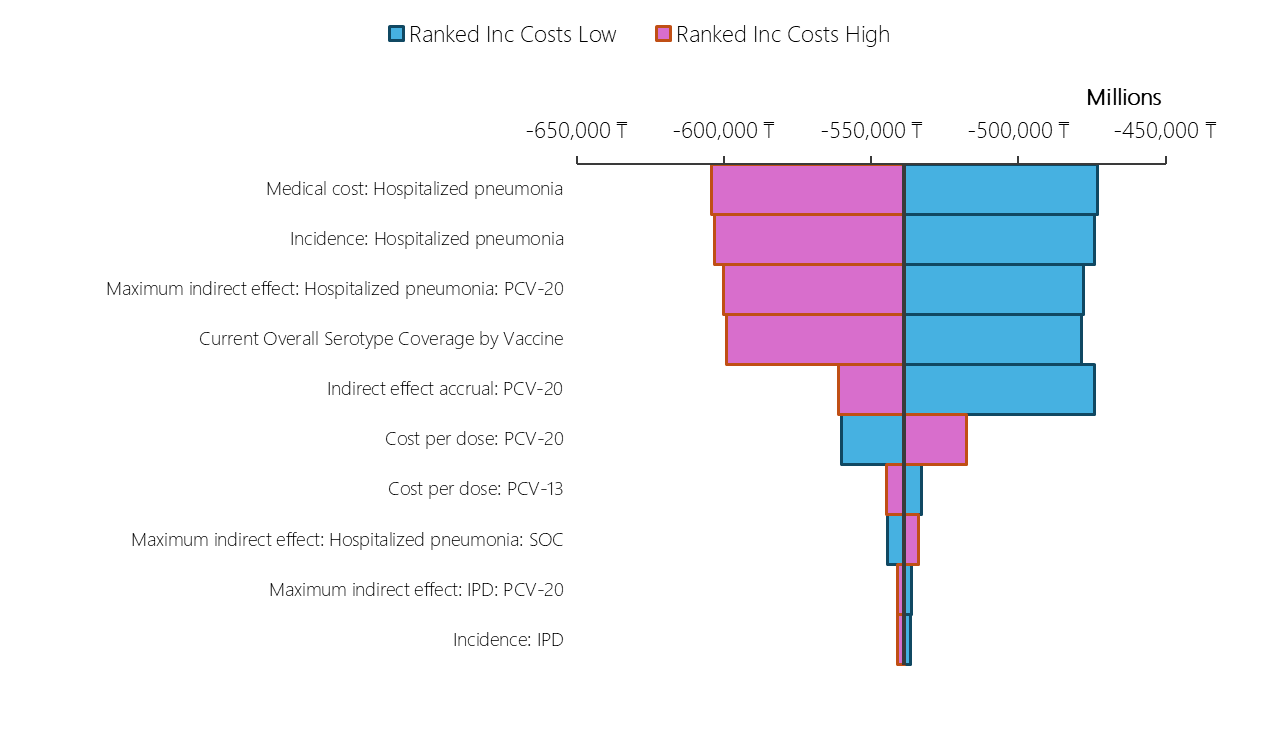 |
| 1. **DSA QALY result**   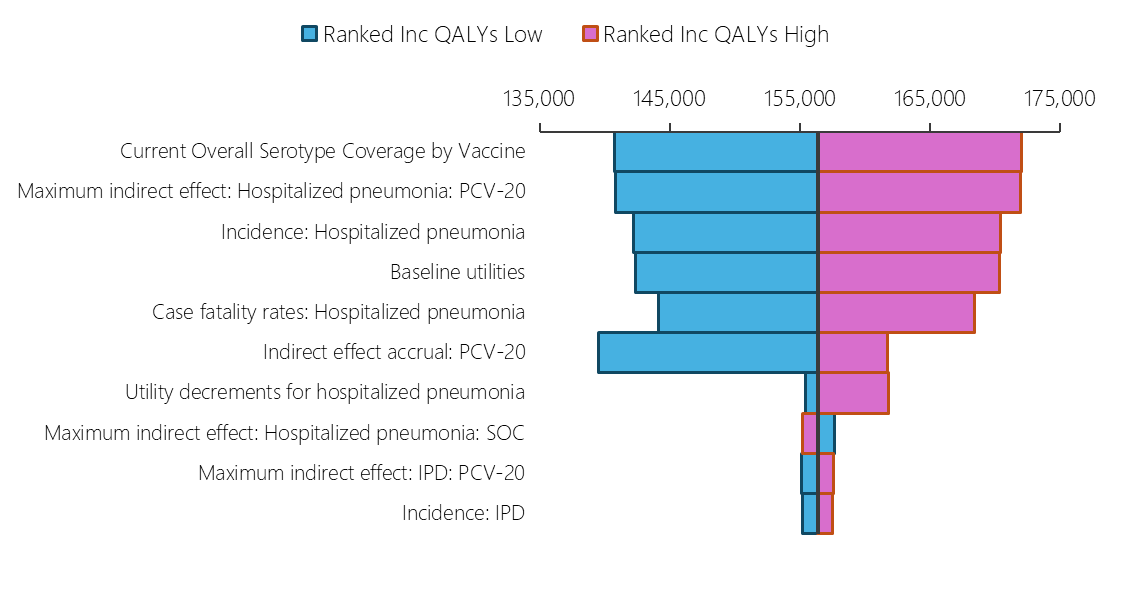 |

| **Figure S2.** Deterministic sensitivity analysis results for PCV20-PFE 3+1 vs PCV10-SII 3+0 |
| --- |
| 1. **DSA cost results**   **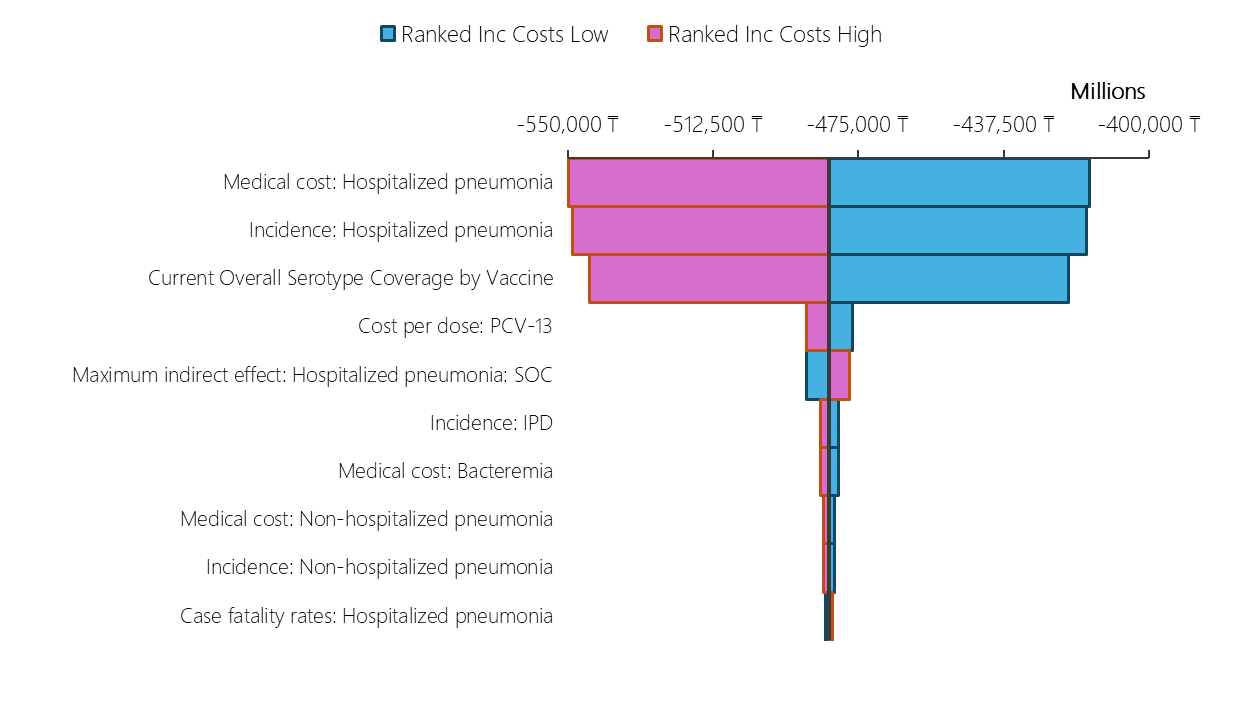** |
| 1. **DSA QALY result**   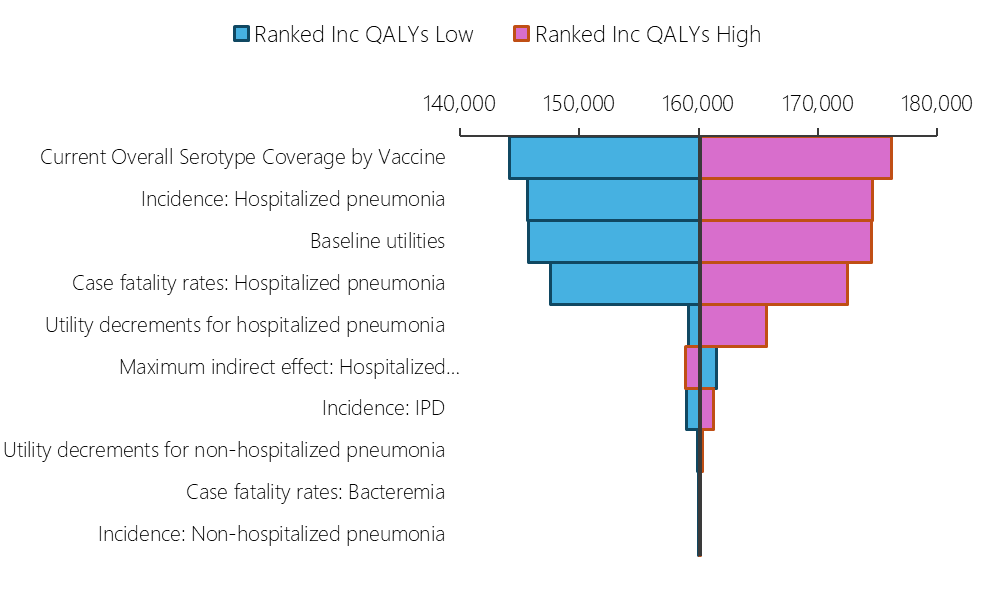 |

| **Figure S3.** Probabilistic sensitivity analysis cost-effectiveness plane for PCV20-PFE 2+1 vs PCV10-SII 3+0 and PCV20-PFE 3+1 vs PCV10-SII 3+0 |
| --- |
| 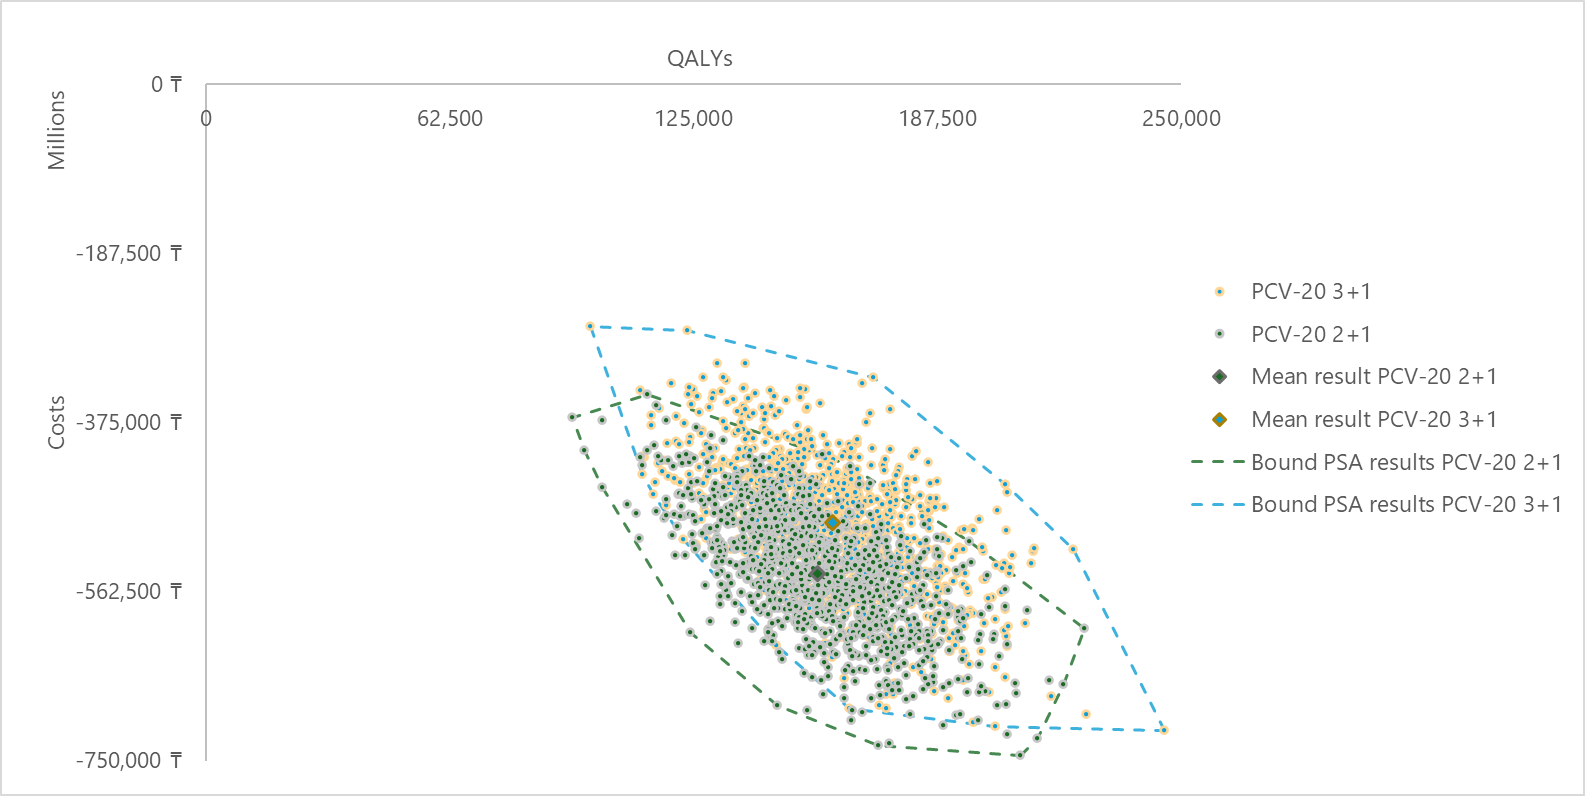 |

| Table S9. PSA summary of results | | |
| --- | --- | --- |
|  | **PCV20-PFE 2+1** | **PCV20-PFE 3+1** |
| **Proportion per quadrant Vs SoC :PCV10-SII 3+0** | | |
| **Less Costly / More Effective** | 100% | 100% |
| **QALY results summary Vs SoC: PCV10-SII 3+0** | | |
| **Base Values** | 156,355 | 160,116 |
| **Mean Values** | 156,616 | 160,671 |
| **Cost results summary Vs SoC: PCV10-SII 3+0** | | |
| **Base Values** | -538,765,413,162 ₸ | -482,527,936,942 ₸ |
| **Mean Values** | -542,166,843,642 ₸ | -486,266,871,028 ₸ |

# References

1. Bureau of National statistics. Agency for Strategic planning and reforms of the Republic of Kazakhstan. (Date of change: 06.10.2025)
2. United Nations, Department of Economic and Social Affairs, Population Division (2024)-Kazakhstan. *World Population Prospects 2024, Online Edition*.
3. National Reference Centre. *Analýza epidemiologickej situácie a činnosti odborov epidemiológie v Slovenskej republike za rok 2019*. 2019 30 June 2023]; Available from: <https://www.uvzsr.sk/documents/d/ruvzbb/vs_2019_nrc_pneumokoky>.
4. Melegaro, A. and W.J. Edmunds, *Cost-effectiveness analysis of pneumococcal conjugate vaccination in England and Wales.* Vaccine, 2004. **22**(31-32): p. 4203-14.
5. Rozenbaum, M.H., et al., *Cost effectiveness of pneumococcal vaccination among Dutch infants: an economic analysis of the seven valent pneumococcal conjugated vaccine and forecast for the 10 valent and 13 valent vaccines.* Bmj-British Medical Journal, 2010. **340**.
6. Stoecker, C., et al., *Cost-effectiveness of using 2 vs 3 primary doses of 13-valent pneumococcal conjugate vaccine.* Pediatrics, 2013. **132**(2): p. e324-32.
7. Mangen, M.J., et al., *The impact of community-acquired pneumonia on the health-related quality-of-life in elderly.* BMC Infect Dis, 2017. **17**(1): p. 208.
8. Mangen, M.J., et al., *Cost-effectiveness of adult pneumococcal conjugate vaccination in the Netherlands.* Eur Respir J, 2015. **46**(5): p. 1407-16.
9. Zrubka, Z., et al., *Towards a Central-Eastern European EQ-5D-3L population norm: comparing data from Hungarian, Polish and Slovenian population studies.* The European Journal of Health Economics, 2019. **20**: p. 141-154.
10. Data provided to Pfizer.
11. Savulescu, C., et al., Effectiveness of 10 and 13-valent pneumococcal conjugate vaccines against invasive pneumococcal disease in European children: SpIDnet observational multicentre study. Vaccine, 2022. 40(29): p. 3963-3974.
12. Hansen, J., et al., Effectiveness of heptavalent pneumococcal conjugate vaccine in children younger than 5 years of age for prevention of pneumonia: updated analysis using World Health Organization standardized interpretation of chest radiographs. Pediatr Infect Dis J, 2006. 25(9): p. 779-81.
13. Black, S.B., et al., Effectiveness of heptavalent pneumococcal conjugate vaccine in children younger than five years of age for prevention of pneumonia. Pediatr Infect Dis J, 2002. 21(9): p. 810-5.
14. Black, S., et al., Efficacy, safety and immunogenicity of heptavalent pneumococcal conjugate vaccine in children. Northern California Kaiser Permanente Vaccine Study Center Group. Pediatr Infect Dis J, 2000. 19(3): p. 187-95.
15. Ladhani, S.N., et al., Rapid increase in non-vaccine serotypes causing invasive pneumococcal disease in England and Wales, 2000–17: a prospective national observational cohort study. The Lancet Infectious Diseases, 2018. 18(4): p. 441-451.
16. Levy, C., et al., Impact of PCV13 on community-acquired pneumonia by C-reactive protein and procalcitonin levels in children. Vaccine, 2017. 35(37): p. 5058-5064.
17. Rodrigo, C., et al., Impact of infant 13-valent pneumococcal conjugate vaccine on serotypes in adult pneumonia. Eur Respir J, 2015. 45(6): p. 1632-41.
18. Lau, W.C., et al., Impact of pneumococcal conjugate vaccines on childhood otitis media in the United Kingdom. Vaccine, 2015. 33(39): p. 5072-9.
